# Supplementary material for: A Systematic Review of Human and Robot Personality in Health Care Human-Robot Interaction
Source: Frontiers journal article supplement (doi:10.3389/frobt.2021.748246), 2021-09-17
Supplement: Data_Sheet_1.PDF [file Data_Sheet_1.PDF]

## Supplementary Material

### 1 SUPPLEMENTARY TABLES

#### 1.1 Funding by Study

| Study                      | Robot Utilized             | Type         |
|----------------------------|----------------------------|--------------|
| Andrist et al. (2015)      | Meka robot                 | Humanoid     |
| Broadbent et al. (2013)    | Peoplebot healthcare robot | Machine-Like |
| Conti et al. (2017)        | Video of NAO               | Humanoid     |
| Cruz-Maya and Tapus (2016) | Kompai Robot               | Humanoid     |
| Damholdt et al. (2015)     | The Telenoid               | Humanoid     |
| Dang and Tapus (2015)      | Video of NAO               | Humanoid     |
| Gockley and Matarić (2006) | Pioneer 2-DX               | Machine-Like |
| Goetz and Kiesler (2002)   | Nursebot                   | Humanoid     |
| Hoffman et al. (2014)      | Travis                     | Machine-Like |
| Kleanthous et al. (2016)   | GrowMeUp System            | Machine-Like |
| Looije et al. (2010)       | icat                       | Humanoid     |
| Powers and Kiesler (2006)  | Unspecified Robot          | Humanoid     |
| Rossi et al. (2018)        | Pepper                     | Humanoid     |
| Sehili et al. (2014)       | NAO                        | Humanoid     |
| Sundar et al. (2017)       | Home Mate Robot            | Machine-Like |
| Tapus and Matarić (2008)   | Pioneer 2-DX               | Machine-Like |
| Tay et al. (2014)          | Unspecified Robot          | Humanoid     |
| Weiss et al. (2012)        | Pictures of NAO            | Humanoid     |

**Table S1.** Table summarizing the specific robots utilized across studies.

## 1.2 Robots Utilized by Study

| Study                      | Funded By                                                                                                                                                        |
|----------------------------|------------------------------------------------------------------------------------------------------------------------------------------------------------------|
| Andrist et al. (2015)      | Chateaubriand Research Fellowship.                                                                                                                               |
| Broadbent et al. (2013)    | This research was funded by a University of Auckland Research Excellence award.                                                                                  |
| Conti et al. (2017)        | European Union's H2020 research and innovation program under the MSCA-Individual Fellowship grant agreement no. 703489.                                          |
| Cruz-Maya and Tapus (2016) | CONACYT-French Government n.382035.<br>EU Horizon2020 ENRICHME project grant agreement no. 643691C.                                                              |
| Damholdt et al. (2015)     | VELUX FOUNDATION<br>Department of Health and Assisted Living Technologies (Municipality of Aarhus),                                                              |
| Dang and Tapus (2015)      | French National Research Agency (ANR) via the Chaire D'Excellence program 2009<br>(Human-Robot Interaction for Assistive Applications).                          |
| Gockley and Matarić (2006) | NSF Graduate Research Fellowsh<br>NSF Grants #IIS-032914 and #IIS-0121426.                                                                                       |
| Goetz and Kiesler (2002)   | NSF Grants # 0085796 and #1120180                                                                                                                                |
| Hoffman et al. (2014)      | FP7 Marie Curie CIG #293733, and<br>Binational Science Foundation Grant #2011381.                                                                                |
| Kleanthous et al. (2016)   | European Commission within the H2020-PHC-2014,<br>(Grant Agreement: 643647)                                                                                      |
| Looije et al. (2010)       | IOP-MMI Senter Novem via the Dutch Ministry of Economics                                                                                                         |
| Powers and Kiesler (2006)  | NSF Grant #IIS-0121426                                                                                                                                           |
| Rossi et al. (2018)        | European Union's H2020, MSCA-IF no.703489.<br>MIUR's PRIN2015 "UPA4SAR" project n. 2015KB-L78T.                                                                  |
| Sehili et al. (2014)       | Not Specified                                                                                                                                                    |
| Sundar et al. (2017)       | KORUS Tech Program (KT-2010-SW-AP-FSO-0004)<br>as part of the International Collaborative R&D Program of the Korea Ministry of Science, ICT and Planning (MSIP). |
| Tapus and Matarić (2008)   | USC Women in Science and Engineering (WiSE) Program and the OkawaFoundation                                                                                      |
| Tay et al. (2014)          | Not Specified                                                                                                                                                    |
| Weiss et al. (2012)        | Not Specified                                                                                                                                                    |

**Table S2.** Table summarizing funding sources by study where provided
